# Supplementary material
Source: MDPI journal article supplement (https://www.mdpi.com/2072-4292/9/4/370)
Supplement: s1 [file s1]

Supplementary Materials: Prototyping of LAI and FPAR Retrievals from MODIS Multi-Angle Implementation of Atmospheric Correction (MAIAC) Data

Chi Chen, Yuri Knyazikhin, Taejin Park, Kai Yan, Alexei Lyapustin, Yujie Wang, Bin Yang and Ranga B. Myneni


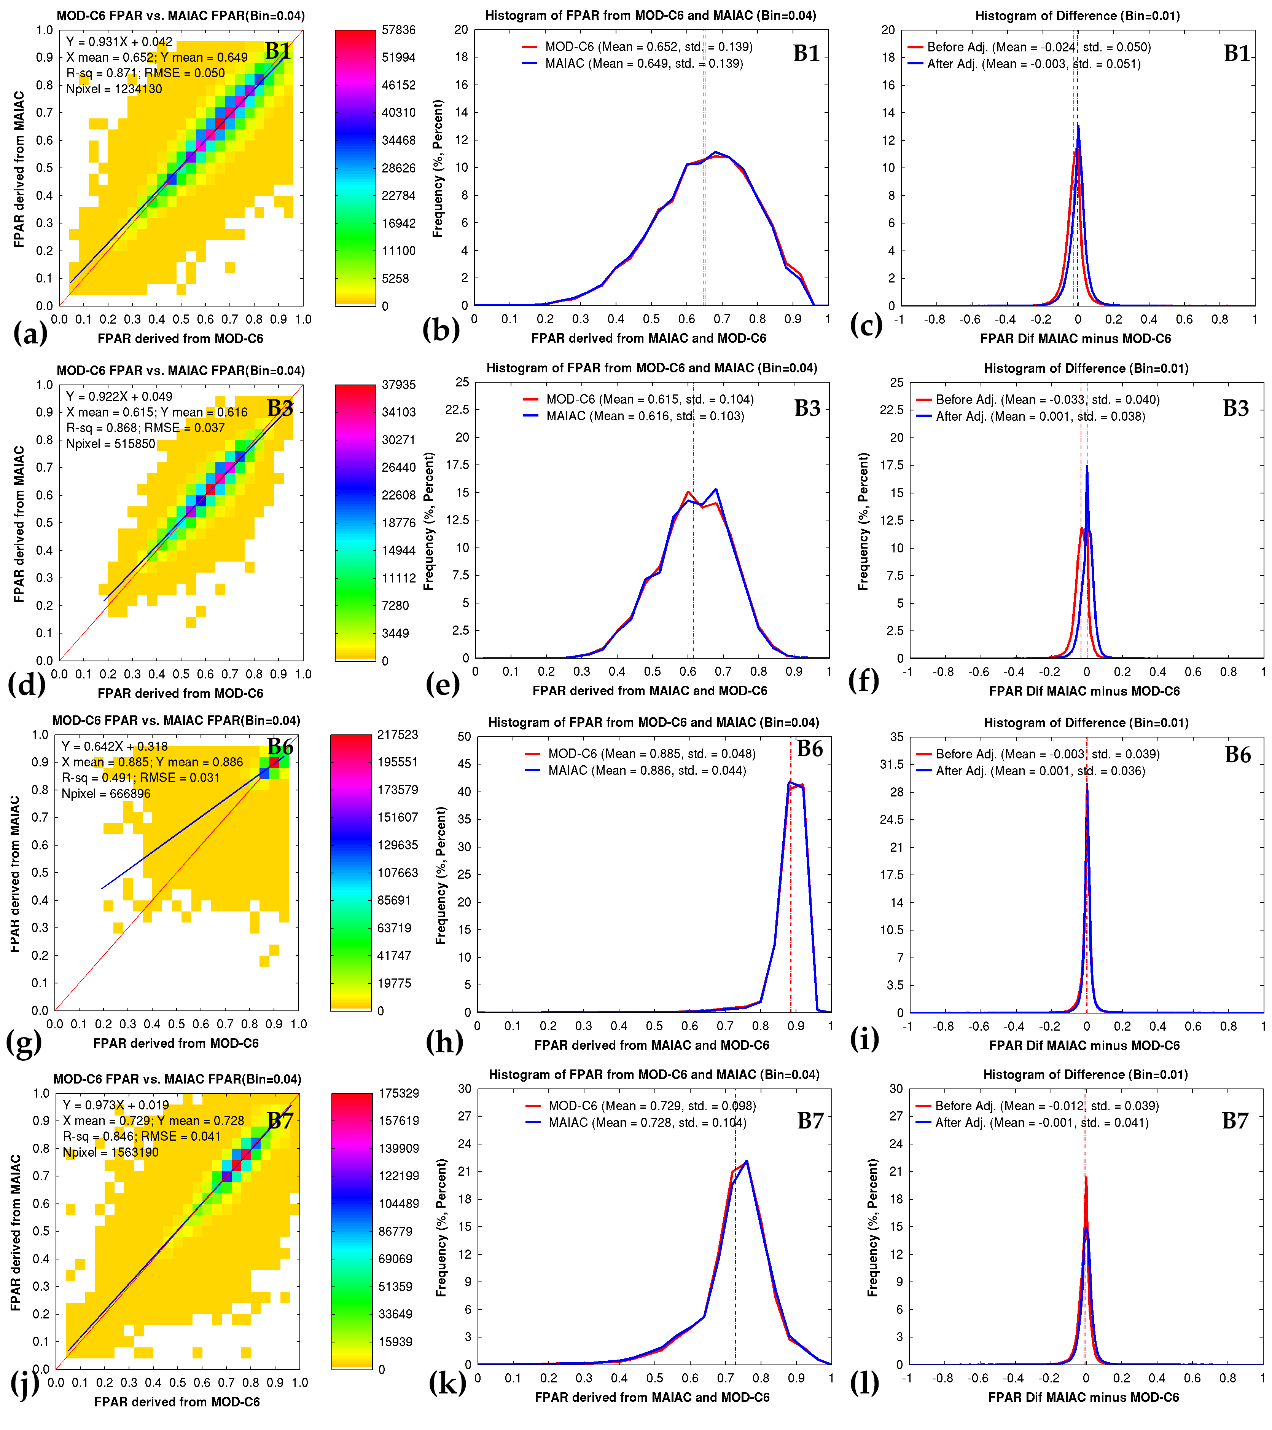


**Figure S1.** Comparison of MODIS C6 and MAIAC FPAR over selected regions with good quality input for grasses and cereal crops (Biome 1, (**a–c**)), broadleaf crops (Biome 3, (**d–f**)), deciduous broadleaf forests (Biome 6, (**g–i**)), and deciduous needleleaf forests (Biome 7, (**j–l**)) generated by the main algorithm during the compositing period between 4 and 11 July 2002. Shown are MAIAC versus C6 FPARs scatterplots (first column), histograms of MAIAC (blue) and C6 (red) FPARs (second column), and the difference between retrievals before (red) and after (blue) calibration of the algorithm for MAIAC data (third column). The dashed vertical lines show mean values of the histograms.


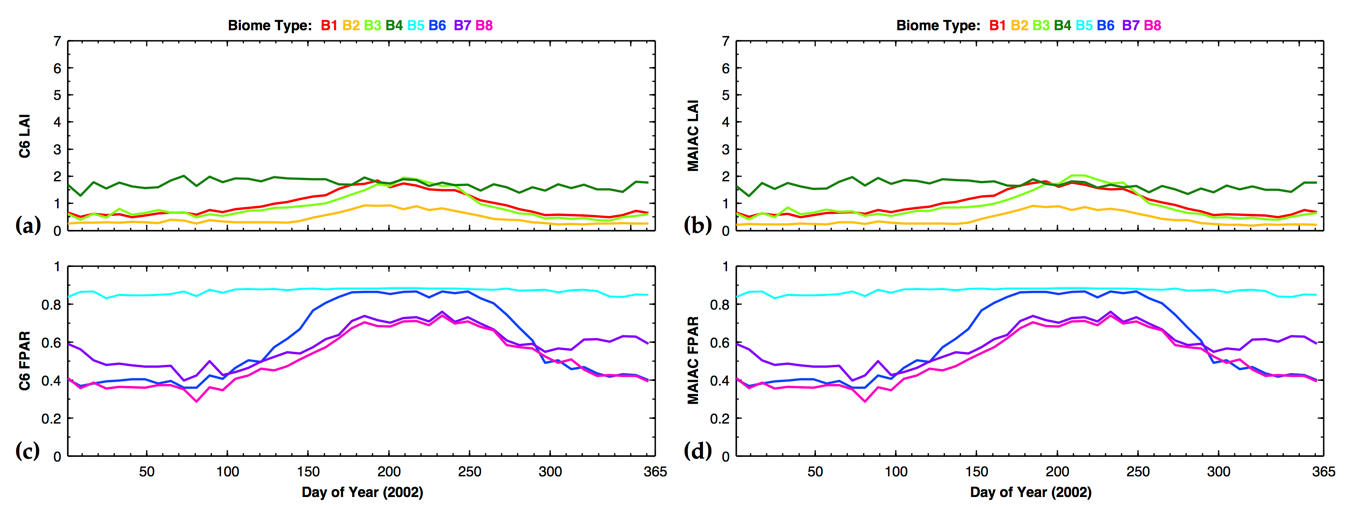


**Figure S2.** Supplementary seasonal variations in (**a**) C6 LAI and (**b**) MAIAC LAI of non-forest (B1–B4); and (**c**) C6 FPAR and (**d**) MAIAC FPAR of forests (B5–B8) biome types in 2002. Retrievals generated by the main algorithm over selected regions were used to derive LAI and FPAR trajectories.

**Table S1**. Validation sites and mean LAIs over 3 km × 3 km areas.

| Site Name | Lat. | Lon. | MODIS tile | Dominant Biome | Instrument | Mean LAI | Year | DOY |
| --- | --- | --- | --- | --- | --- | --- | --- | --- |
| KONZ | 39.09 | –96.57 | h10v05 | Grasses/Cereal Crops | 1LAI-2000 | 1.960 | 2000 | 159 |
|  |  |  |  |  |  | 2.161 | 2000 | 239 |
|  |  |  |  |  |  | 2.907 | 2001 | 228 |
| NOBS | 55.89 | –98.48 | h12v03 | Deciduous Needleleaf Forest | LAI-2000 | 3.485 | 2000 | 196 |
|  |  |  |  |  |  | 3.483 | 2001 | 195 |
|  |  |  |  |  |  | 3.181 | 2002 | 195 |
| SW-Ontario10 | 45.08 | –77.51 | h12v04 | Deciduous Broadleaf Forest | 2DHP | 3.666 | 2002 | 227 |
| SW-Ontario11 | 44.83 | –77.61 | h12v04 | Deciduous Broadleaf Forest | DHP | 3.593 | 2002 | 227 |
| SW-Ontario12 | 44.59 | –77.71 | h12v04 | Deciduous Broadleaf Forest | DHP | 3.525 | 2002 | 227 |
| SW-Ontario13 | 45.01 | –77.17 | h12v04 | Deciduous Broadleaf Forest | DHP | 3.712 | 2002 | 227 |
| SW-Ontario14 | 44.76 | –77.27 | h12v04 | Deciduous Broadleaf Forest | DHP | 3.677 | 2002 | 227 |
| SW-Ontario15 | 44.52 | –77.36 | h12v04 | Deciduous Broadleaf Forest | DHP | 3.489 | 2002 | 227 |
| SW-Ontario6 | 44.73 | –78.42 | h12v04 | Deciduous Broadleaf Forest | DHP | 3.776 | 2002 | 227 |
| SW-Ontario7 | 45.15 | –77.87 | h12v04 | Deciduous Broadleaf Forest | DHP | 3.936 | 2002 | 227 |
| SW-Ontario8 | 44.90 | –77.97 | h12v04 | Deciduous Broadleaf Forest | DHP | 4.180 | 2002 | 227 |
| Thompson1 | 56.05 | -98.16 | h12v03 | Deciduous Needleleaf Forest | DHP | 1.571 | 2001 | 196 |
| Thompson2 | 55.78 | –98.16 | h12v03 | Deciduous Needleleaf Forest | DHP | 1.962 | 2001 | 196 |
| Walnut Creek | 41.93 | –93.75 | h11v04 | Broadleaf Crops | LAI-2000 | 1.386 | 2002 | 174 |
|  |  |  |  |  |  | 2.145 | 2002 | 182 |
|  |  |  |  |  |  | 2.880 | 2002 | 189 |
| Turco1 | –18.24 | –68.18 | h11v10 | Shrubs | DHPs | 0.312 | 2001 | 208 |
| Turco2 | –18.24 | –68.19 | h11v10 | Shrubs | DHPs | 0.041 | 2002 | 240 |
|  |  |  |  |  |  | 0.034 | 2002 | 240 |
|  |  |  |  |  |  | 0.068 | 2003 | 105 |
| Wisconsin | 45.80 | –90.08 | h11v04 | Deciduous Broadleaf Forest | LAI-2000 | 1.667 | 2002 | 146 |

1LAI-2000 = LAI-2000 Plant Canopy Analyzer. 2DHP = Digital Hemispherical Photography

**Table S****2.** Comparison ofMOD09GA and MAIAC daily NIR BRF.

|  |  | B1 | B2 | B3 | B4 | B5 | B6 | B7 | B8 |
| --- | --- | --- | --- | --- | --- | --- | --- | --- | --- |
| Good quality |  | 0.340 | 0.223 | 0.379 | 0.261 | 0.291 | 0.368 | 0.204 | 0.223 |
| Coefficient of variation, % | 19.71 | 22.87 | 15.83 | 17.24 | 16.49 | 17.66 | 23.53 | 23.77 |
|  | 0.338 | 0.223 | 0.379 | 0.261 | 0.3 | 0.37 | 0.205 | 0.224 |
| Coefficient of variation, % | 19.23 | 22.42 | 16.09 | 16.86 | 16.33 | 17.30 | 22.44 | 22.32 |
| Difference 1, % | –0.59 | 0.03 | 0 | –0.15 | 1.29 | 0.57 | 0.51 | 0.25 |
| Poor  quality |  | 0.375 | 0.246 | 0.4 | 0.281 | 0.288 | 0.384 | 0.207 | 0.23 |
| Coefficient of variation, % | 24.00 | 49.19 | 14.50 | 22.42 | 21.53 | 18.23 | 40.58 | 42.17 |
|  | 0.361 | 0.217 | 0.397 | 0.281 | 0.29 | 0.389 | 0.195 | 0.213 |
| Coefficient of variation, % | 20.22 | 23.96 | 14.61 | 22.42 | 20.34 | 17.99 | 26.67 | 27.23 |
| Difference, % | –3.79 | –12.03 | –0.41 | –0.2 | 0.74 | 1.19 | –5.76 | –7.56 |
| MOD09GA | Good–Poor 2, ×10–2 | –4.39 | –3.25 | –1.58 | –2.89 | –0.62 | –0.51 | –0.74 | –1.78 |
| (Good-Poor)/Good, % | –14.85 | –17.15 | –5.57 | –12.51 | –3.41 | –2.58 | –5.69 | –11.24 |
| MAIAC | Good–Poor, ×10–2 | –2.88 | –0.33 | –1.34 | –2.89 | –0.39 | –0.73 | 0.54 | –0.01 |
| (Good–Poor)/Good, % | –9.85 | –2.29 | –4.96 | –12.39 | –2.48 | –2.89 | 1.93 | –0.95 |

1Difference is defined as 2Good – Poor is defined as the average of pixel-wise difference between good and poor condition observations during the 8-day period.
